# Supplementary material for: Construction of a Cd8Tb4 nanoring for luminescence response to 2,6-dipicolinic acid as an anthrax biomarker
Source: Royal Society of Chemistry journal article supplement (doi:10.1039/d2ce00502f), 2022-01-01
Supplement: d2ce00502f1.pdf [file d2ce00502f1.pdf]

## Supporting Information

### **Construction of a Cd<sub>8</sub>Tb<sub>4</sub> nanoring for luminescence response to 2,6-dipicolinic acid as an anthrax biomarker**

**Yanan Ma,<sup>a</sup> Xiaoping Yang,<sup>\*,a</sup> Xilong Leng,<sup>a</sup> and Desmond Schipper<sup>b</sup>**

<sup>a</sup> College of Chemistry and Materials Engineering, Wenzhou University, Wenzhou 325035, China.

<sup>b</sup> The University of Texas at Austin, Department of Chemistry and Biochemistry, 1 University Station A5300, Austin, Texas, 78712, United States.

Corresponding author: xpyang@wzu.edu.cn

### **Contents**

|                                                                                                    |     |
|----------------------------------------------------------------------------------------------------|-----|
| 1. General information.....                                                                        | S2  |
| 2. Synthesis of the ligand H <sub>2</sub> L.....                                                   | S2  |
| 3. <sup>1</sup> H NMR spectra of the intermediates and ligand H <sub>2</sub> L.....                | S4  |
| 4. <sup>13</sup> C NMR spectra of the intermediates and ligand H <sub>2</sub> L.....               | S5  |
| 5. IR spectra of ligand H <sub>2</sub> L and <b>1</b> .....                                        | S7  |
| 6. The coordination modes of metal ions in <b>1</b> .....                                          | S7  |
| 7. The thermogravimetric analysis of <b>1</b> .....                                                | S8  |
| 8. Powder XRD pattern of <b>1</b> .....                                                            | S8  |
| 9. UV-vis absorption spectra of the free ligand H <sub>2</sub> L and <b>1</b> .....                | S9  |
| 10. Photophysical properties of H <sub>2</sub> L and <b>1</b> .....                                | S10 |
| 11. Photophysical properties of <b>1</b> with the addition of DPA.....                             | S11 |
| 12. Chemical structures of carboxylic acids.....                                                   | S12 |
| 13. The lanthanide emission spectra of <b>1</b> with the addition of DPA and carboxylic acids..... | S13 |
| 14. UV-vis titration of <b>1</b> to the addition of DPA.....                                       | S13 |
| 15. UV-Vis absorption spectra of carboxylic acids.....                                             | S14 |
| 16. The luminescence lifetimes of <b>1</b> with the addition of DPA.....                           | S14 |
| 17. The emission spectra of <b>1</b> with the addition of DPA.....                                 | S15 |
| 18. X-Ray Crystallography.....                                                                     | S16 |

## 1. General information

All chemicals were purchased from commercial sources and directly used without further purified. Elemental analysis was performed on a EURO EA3000. NMR spectra were obtained on an AVANCE III AV500 at 298 K. IR spectra were measured on a FTIR-650 spectrometer. The thermogravimetric spectra were obtained on a TA Instruments Q600. Melting points were obtained on an XT-4 electrothermal micromelting point apparatus. Powder XRD spectra were recorded on a D8 Advance. Dynamic light scattering (DLS) measurement was carried out on a Malvern Zetasizer Nano ZS. Scanning electron microscopy (SEM) image and energy dispersive X-ray (EDX) spectroscopy were obtained from a Nova NanoSEM 200 microscope.

**Photophysical Studies.** UV-vis absorbance spectra were determined on an UV-3600 spectrophotometer. Excitation and visible emission spectra were recorded on a FLS 980 fluorimeter. The light source for the spectra was a 450 W xenon arc lamp with continuous spectral distribution from 190 to 2600 nm. Emission lifetimes were obtained by the attached storage digital oscilloscope. Systematic errors have been deducted through the standard instrument corrections.

## 2. Synthesis of the ligand $H_2L$

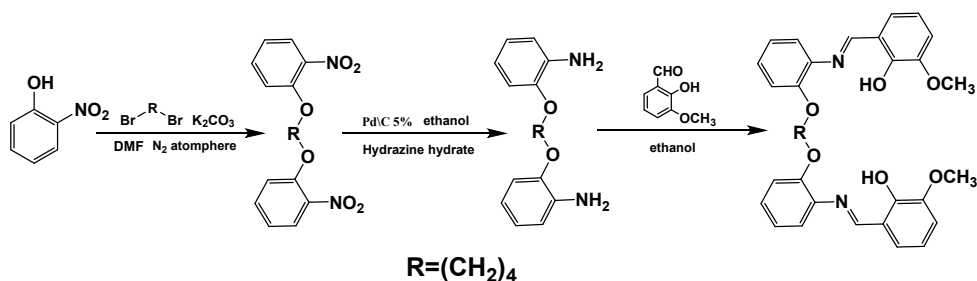

**Scheme S1.** Synthetic Approach to  $H_2L$

**Synthesis of 1,4-bis(2-nitrophenoxy)butane:** 4-nitrophenol (6.00 g, 43.11 mmol) and dry  $K_2CO_3$  (2.97 g, 21.55 mmol) were added into a 100 mL round-bottomed flask with 25 mL dry dimethylformamide (DMF). Then a solution of 1,4-dibromobutane (4.17 g, 20.67 mmol) in 5 mL dry DMF was added drop-wise. The mixture was heated to 115°C for overnight, then cooled on crushed ice. The yellow solid product was collected by filtration and washed successively with water, ethanol and diethyl ether, and then dried

under vacuum for two hours. Yield: 4.35 g (80%). EA: C, 57.62; H, 4.70; N, 8.61 % (found). Calc. for  $C_{16}H_{16}O_6N_2$ : C, 57.83; H, 4.85; N, 8.43 %. m. p. = 155°C.  $^1H$  NMR ( $\delta_H$ , ppm, 500MHz, DMSO- $d_6$ ): 7.863 (d,  $J$  = 8.00 Hz, 2H), 7.65 (t,  $J$  = 8.50 Hz, 2H), 7.36 (d,  $J$  = 8.50 Hz, 2H), 7.11 (t,  $J$  = 7.50 Hz, 2H), 4.24 (s, 4H), 1.910 (s, 4H);  $^{13}C$  NMR (125 MHz, DMSO- $d_6$ ,  $\delta_C$ ): 151.24, 139.55, 134.32, 124.80, 120.36, 115.03, 68.71, 24.98. ESI-MS (positive, DMF): calc.,  $m/z$  = 332; found,  $m/z$  = 332.10.

**Synthesis of 2,2'-(butane-1,4-diylbis(oxy))dianiline:** A mixture of 1,4-bis(2-nitrophenoxy)butane (2 g, 6.02 mmol), Pd-C (0.5 g, 10%), and hydrazine monohydrate (3 mL, 80%) in ethanol (30 mL) was heated to 80°C under nitrogen atmosphere for 8 h. The solution was filtered to remove Pd-C, and cooled to room temperature to give a precipitate, which then was isolated by filtration and recrystallized from ethanol. The solid product was dried under vacuum for two hours. Yield: 1.20 g (72%). EA: C, 70.35; H, 7.67; N, 10.11 % (found). Calc. for  $C_{16}H_{20}O_2N_2$ : C, 70.56; H, 7.40; N, 10.29 %. m. p. = 162°C.  $^1H$  NMR ( $\delta_H$ , ppm, 500 MHz, DMSO- $d_6$ ): 6.78 (d,  $J$  = 8.00 Hz, 2H), 6.65 (q,  $J$  = 7.50 Hz, 4H), 6.50 (t,  $J$  = 7.50 Hz, 2H), 4.63 (s, 4H, N-H), 3.99 (s, 4H), 1.91 (s, 4H).  $^{13}C$  NMR (125 MHz, DMSO- $d_6$ ,  $\delta_C$ ): 145.60, 137.75, 120.83, 116.20, 113.92, 111.77, 67.49, 25.70. ESI-MS (positive, DMF): calc.,  $m/z$  = 272; found,  $m/z$  = 272.15.

**Synthesis of H<sub>2</sub>L:** 2-Hydroxy-3-methoxybenzaldehyde (20.0 mmol, 3.0430 g) was dissolved in 15 mL EtOH, and a solution of 2,2'-(butane-1,4-diylbis(oxy))dianiline (10.0 mmol, 2.7215 g) in 20 mL EtOH was then added drop by drop. The resulting solution was stirred and heated under reflux for 6 h. It was allowed to cool and was then filtered. The solid was washed with EtOH (3 × 5 mL) and then dried under vacuum to give red product. Yield (based on 2,2'-(butane-1,4-diylbis(oxy))dianiline): 4.6415 g (91%). EA: C, 71.37; H, 5.82; N, 5.26 % (found). Calc. for  $C_{32}H_{32}O_6N_2$ : C, 71.10; H, 5.97; N, 5.18 %. m. p. = 189°C.  $^1H$  NMR ( $\delta_H$ , ppm, 500 MHz,  $CDCl_3$ ): 14.20 (s, 2H), 8.67 (s, 2H), 7.18 (d,  $J$  = 7.50 Hz, 2H), 6.93-6.99 (m, 8H), 6.83 (t,  $J$  = 7.00 Hz, 2H), 4.13 (s, 4H), 3.92 (s, 6H), 2.06 (s, 4H).  $^{13}C$  NMR (125 MHz,  $CDCl_3$ ,  $\delta_C$ ): 161.82, 152.34, 148.73, 127.93, 124.58, 123.68, 120.80, 119.67, 119.57, 118.02, 114.58, 113.14, 68.43, 56.36, 26.20. IR (KBr,  $cm^{-1}$ ): 1616 (w), 1588 (w), 1450 (s), 1360 (w), 1244 (s), 1114 (s), 1040 (s), 967 (s), 861(s), 725(s). ESI-MS (positive,  $CH_2Cl_2$ ): calc.,  $m/z$  = 539.55; found,  $m/z$  = 540.23.

### 3. $^1\text{H}$ NMR spectra of the intermediates and ligand $\text{H}_2\text{L}$

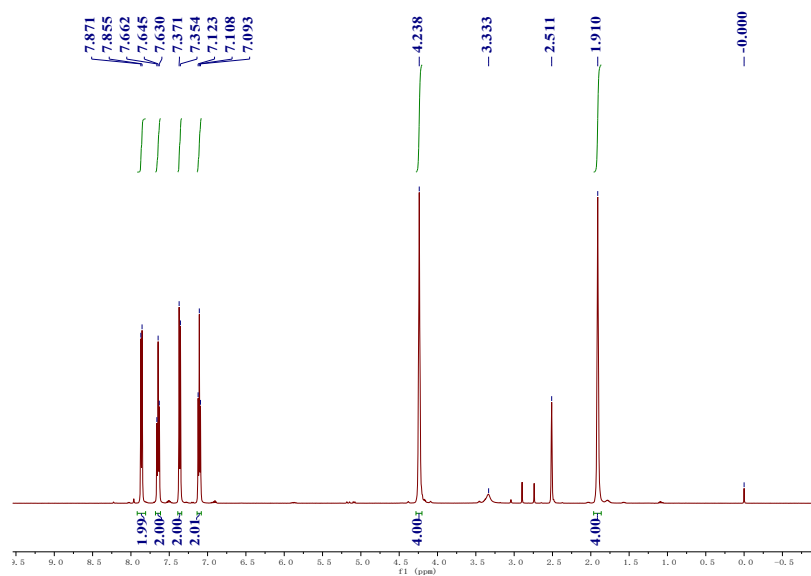

(a)

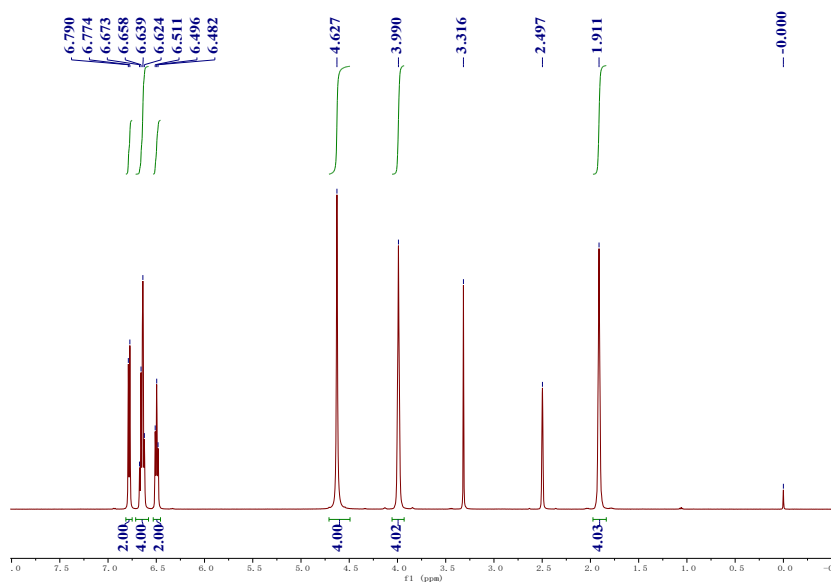

(b)

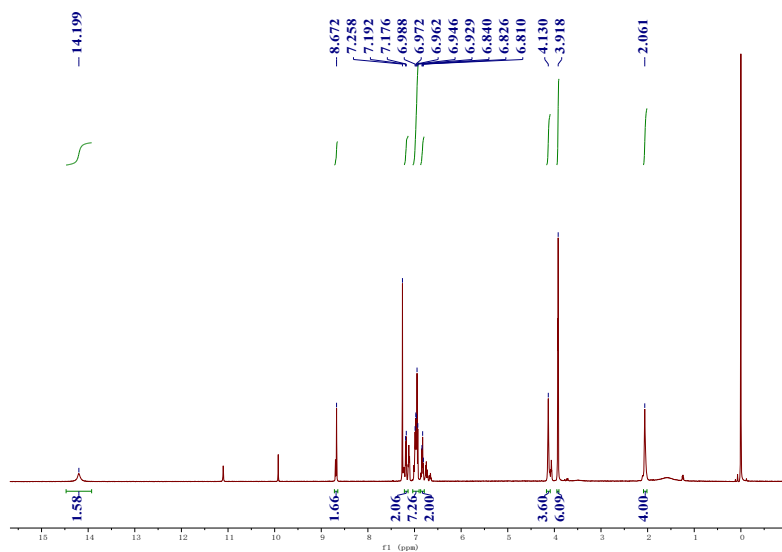

(c)

**Figure S1.** (a) The  $^1\text{H}$  NMR spectrum of 1,4-bis(2-nitrophenoxy)butane in  $\text{DMSO-d}_6$ ; (b) The  $^1\text{H}$  NMR spectrum of 2,2'-(butane-1,4-diylbis(oxy))dianiline in  $\text{DMSO-d}_6$ ; (c) The  $^1\text{H}$  NMR spectrum of  $\text{H}_2\text{L}$  in  $\text{CDCl}_3$ .

#### 4. $^{13}\text{C}$ NMR spectra of the intermediates and ligand $\text{H}_2\text{L}$

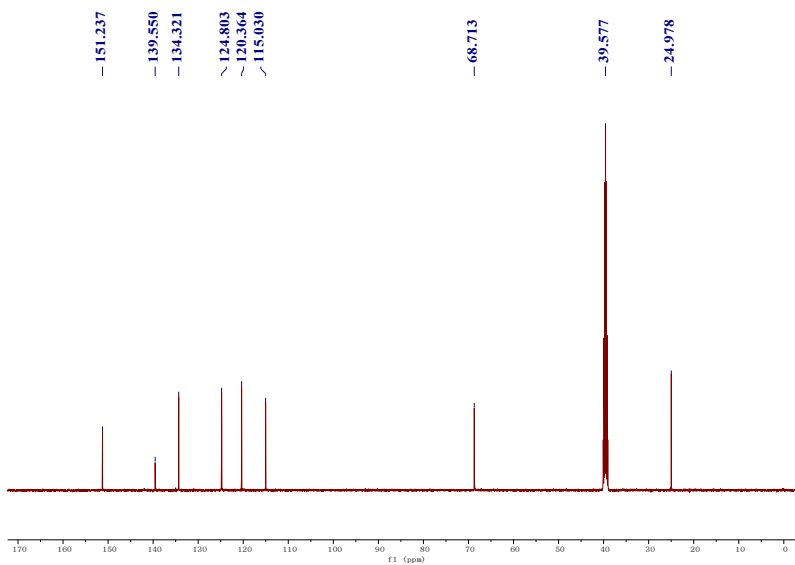

(a)

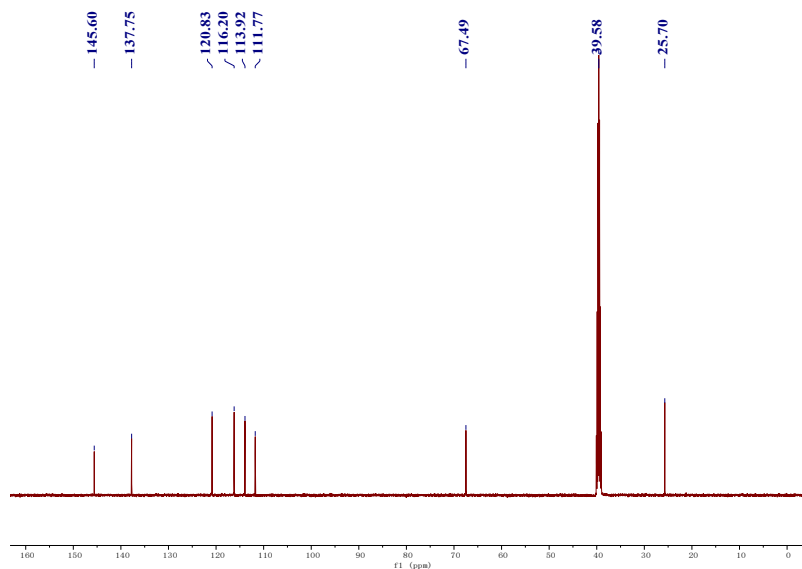

(b)

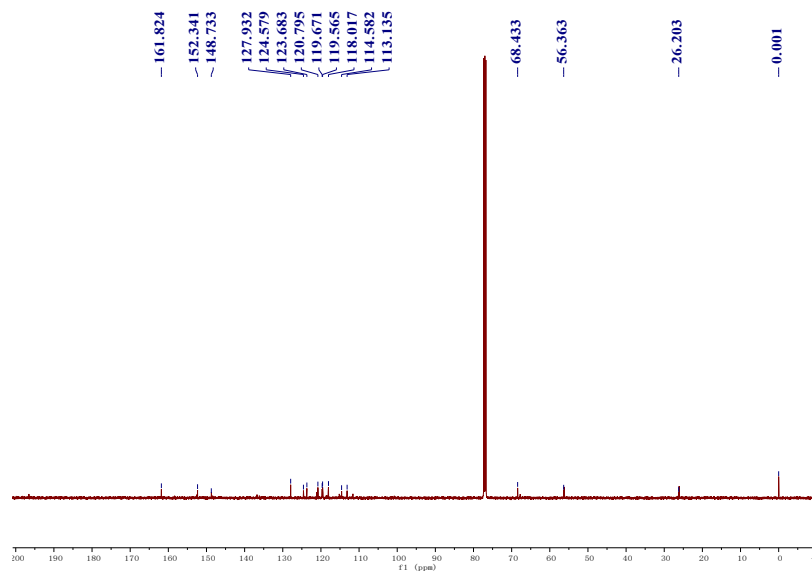

(c)

**Figure S2.** (a) The  $^{13}\text{C}$  NMR spectrum of 1,4-bis(2-nitrophenoxy)butane in  $\text{DMSO-d}_6$ ; (b) The  $^{13}\text{C}$  NMR spectrum of 2,2'-(butane-1,4-diylbis(oxy))dianiline in  $\text{DMSO-d}_6$ ; (c) The  $^{13}\text{C}$  NMR spectrum of  $\text{H}_2\text{L}$  in  $\text{CDCl}_3$ .

## 5. IR spectra of ligand H<sub>2</sub>L and 1

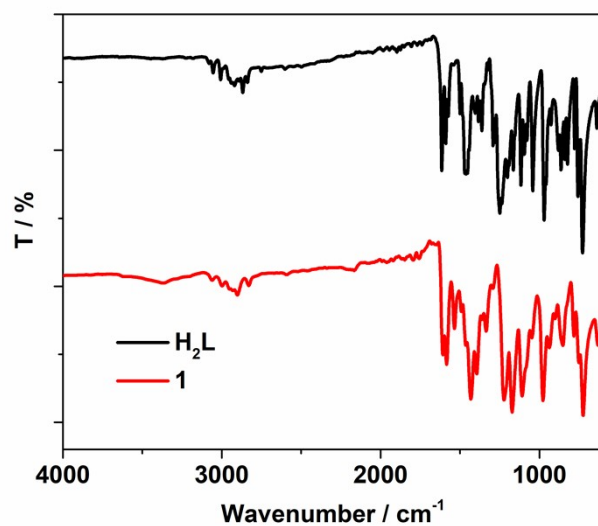

**Figure S3.** IR spectra of the free ligand H<sub>2</sub>L and **1**.

## 6. The coordination modes of metal ions in 1

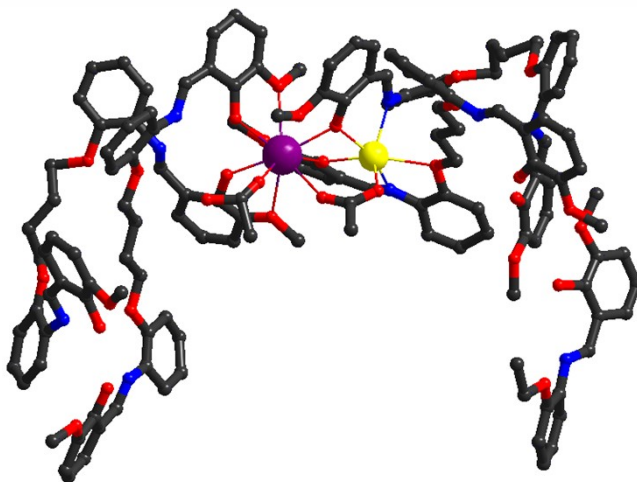

**Figure S4.** The coordination modes of Cd(II) and Tb(III) ions with four Schiff base ligands and two OAc<sup>-</sup> anions in **1**.

## 7. The thermogravimetric analysis of 1

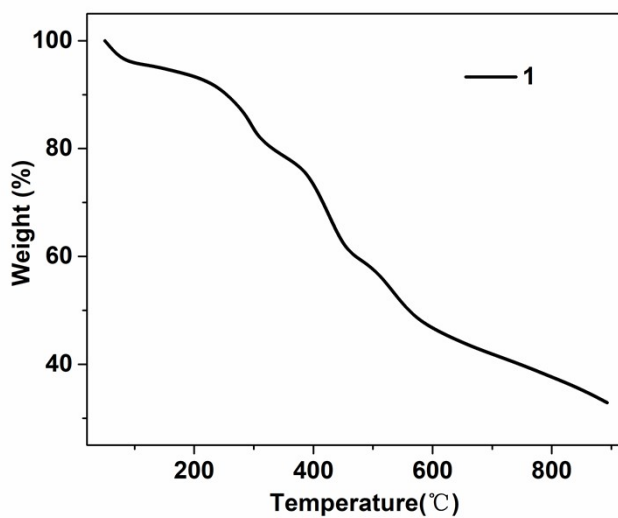

**Figure S5.** The thermogravimetric analysis of **1**.

## 8. Powder XRD pattern of 1

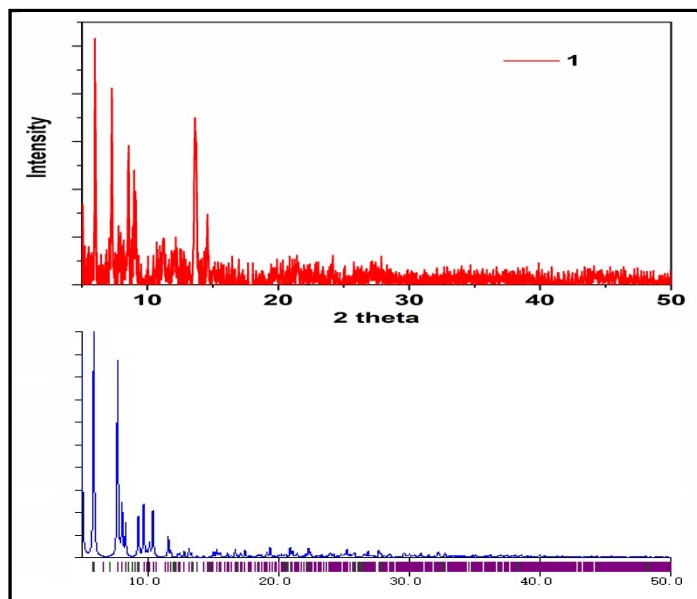

**Figure S6.** Powder XRD pattern of **1**. (top: experimental XRD; bottom: simulated XRD)



## 9. UV-vis absorption spectra of the ligand $H_2L$ and **1**

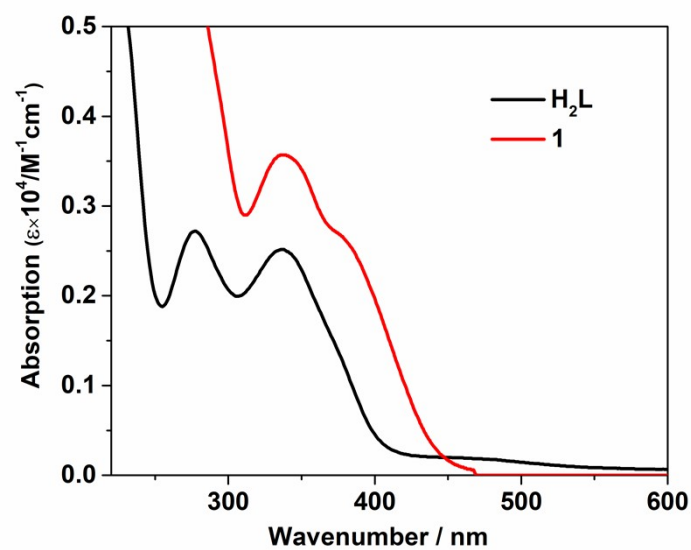

**Figure S7.** UV-vis absorption spectra of the free ligand  $H_2L$  and **1** in  $CH_3CN$ .

## 10. Photophysical properties of H<sub>2</sub>L and **1**

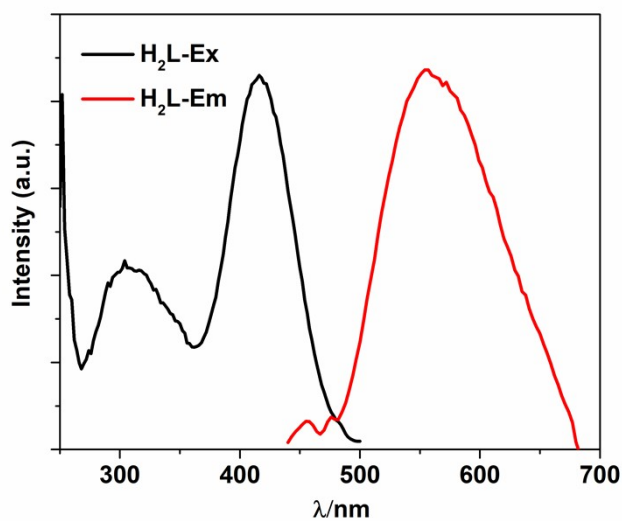

(a)

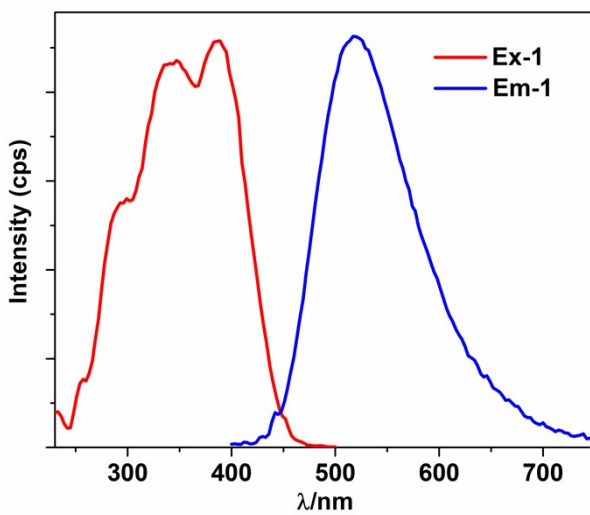

(b)

**Figure S8.** (a) The excitation ( $\lambda_{\text{em}} = 552$  nm) and emission ( $\lambda_{\text{ex}} = 418$  nm) spectra of the free ligand H<sub>2</sub>L in CH<sub>3</sub>CN; (b) The excitation ( $\lambda_{\text{em}} = 520$  nm) and emission ( $\lambda_{\text{ex}} = 386$  nm) spectra of **1** in CH<sub>3</sub>CN.

## 11. Photophysical properties of **1** with the addition of DPA

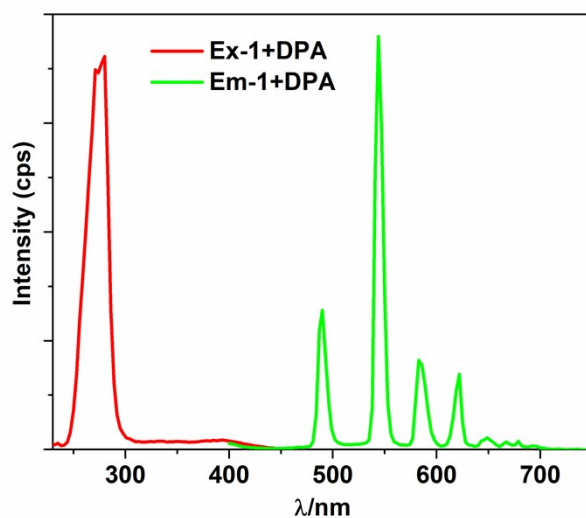

**Figure S9.** The excitation ( $\lambda_{\text{em}} = 544$  nm) and emission ( $\lambda_{\text{ex}} = 272$  nm) spectra of **1** (10  $\mu\text{M}$ ) with the addition of DPA (100  $\mu\text{M}$ ) in CH<sub>3</sub>CN.

## 12. Chemical structures of carboxylic acids

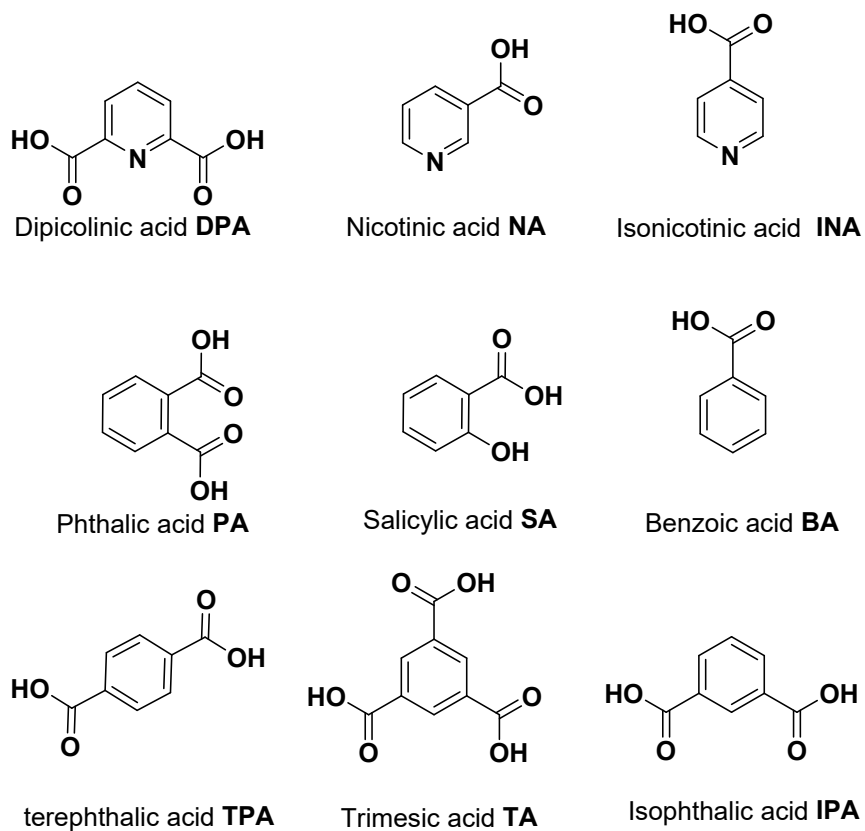

**Scheme S2.** Chemical structures of selected carboxylic acids.

### 13. The lanthanide emission spectra of **1** with the addition of DPA and carboxylic acids

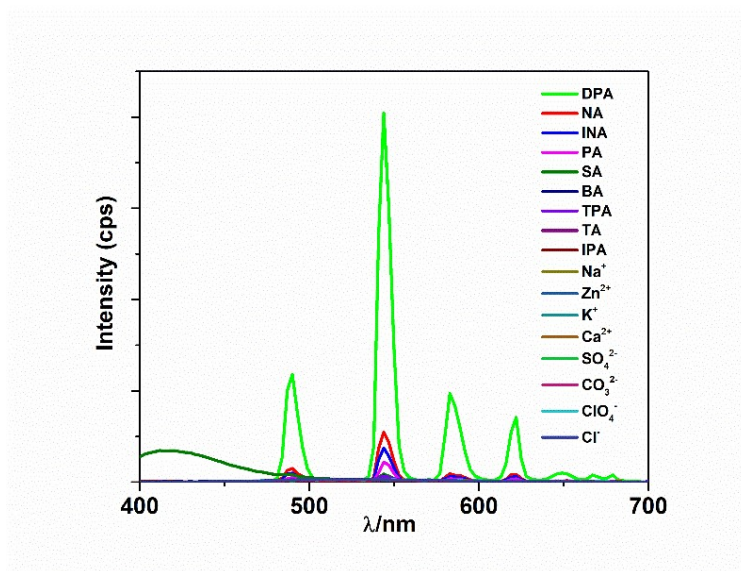

**Figure S10.** The lanthanide emission spectra of **1** ( $10\ \mu\text{M}$ ) with the addition of DPA ( $120\ \mu\text{M}$ ) and carboxylic acids ( $120\ \mu\text{M}$ ) in  $\text{CH}_3\text{CN}$  ( $\lambda_{\text{ex}} = 272\ \text{nm}$ ).

### 14. UV-vis titration of **1** to the addition of DPA

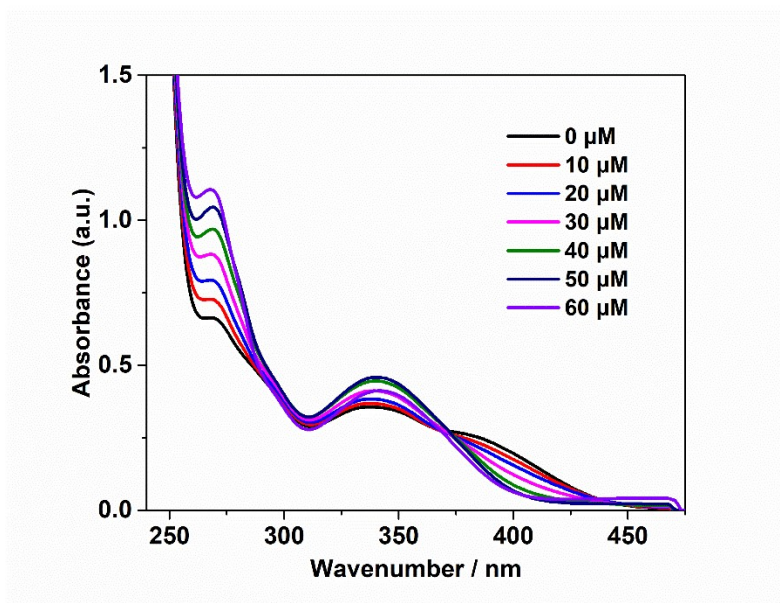

**Figure S11.** UV-vis titration of **1** ( $10\ \mu\text{M}$ ) with the addition of DPA in  $\text{CH}_3\text{CN}$ .

## 15. UV-Vis absorption spectra of carboxylic acids

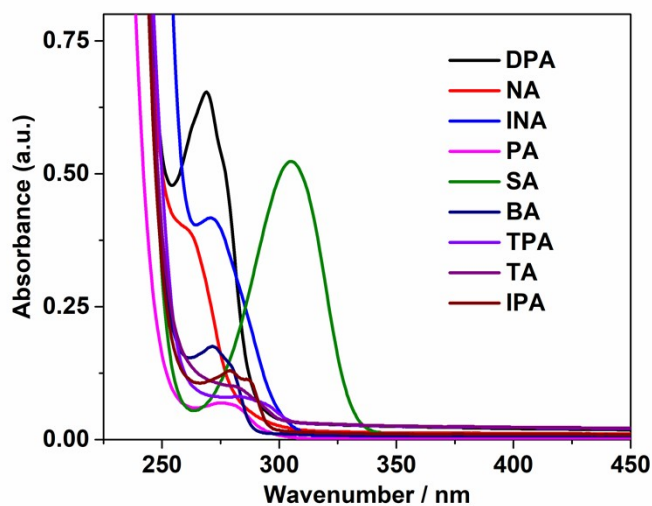

**Figure S12.** UV-vis absorption spectra of the carboxylic acids in CH<sub>3</sub>CN ( $c = 10 \mu\text{M}$ ).

## 16. The luminescence lifetimes of **1** with the addition of DPA

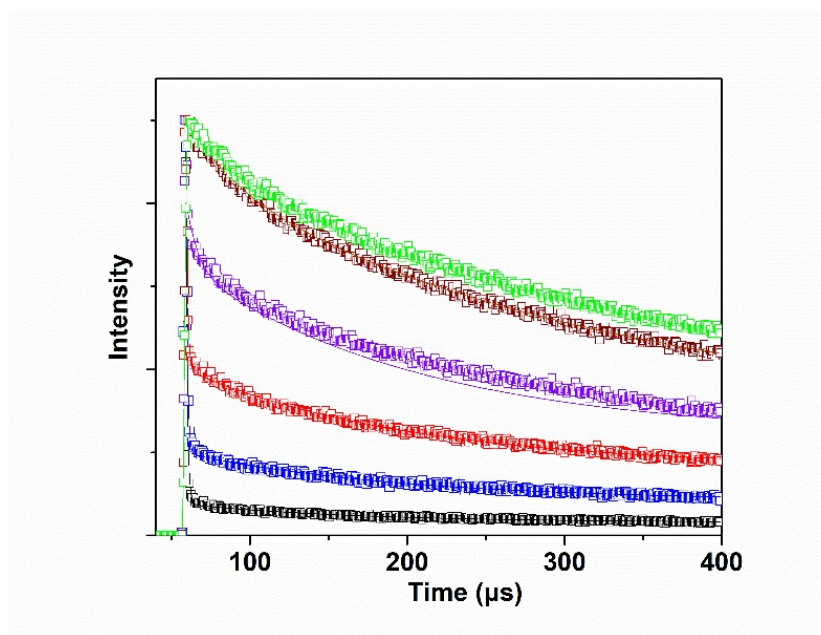

**Figure S13.** The luminescence lifetimes of **1** after the addition of DPA with different concentrations: black (20 μM, 81.09 μs), blue (40 μM, 140.59 μs), red (60 μM, 156.60 μs), purple (80 μM, 260.25 μs), brown (100 μM, 302.25 μs) and green (120 μM, 312.72 μs) lines.

## 17. The emission spectra of **1** with the addition of DPA

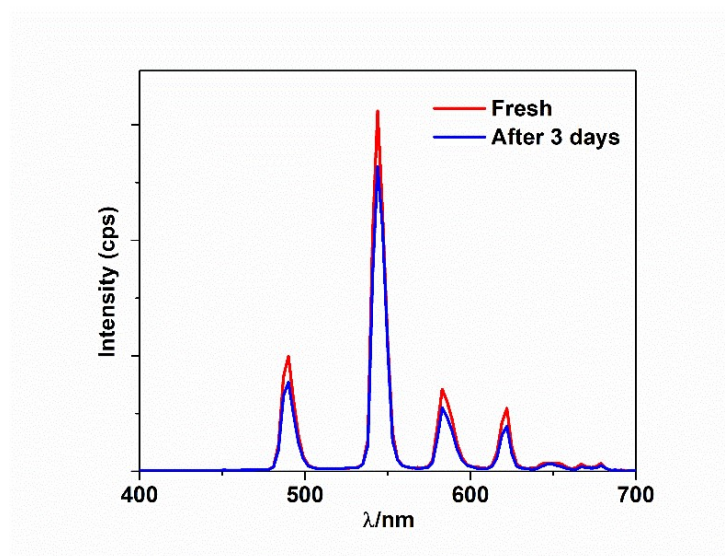

**Figure S14.** The emission spectra of **1** (10  $\mu\text{M}$ ) with the addition of DPA (120  $\mu\text{M}$ ).

## **18. X-Ray Crystallography**

Data were collected on a Smart APEX CCD diffractometer with graphite monochromated Mo-K $\alpha$  radiation ( $\lambda = 0.71073$  Å) at 190 K. The data set was corrected for absorption based on multiple scans and reduced using standard methods. Data reduction was performed using DENZO-SMN.<sup>1</sup> The structures were solved by direct methods and refined anisotropically using full-matrix least-squares methods with the SHELX 97 program package.<sup>2</sup> Coordinates of the non-hydrogen atoms were refined anisotropically, while hydrogen atoms were included in the calculation isotropically but not refined. Neutral atom scattering factors were taken from Cromer and Waber.<sup>3</sup> PLATON98 was used as incorporated in WinGX (Farrugia, 1999). Selected bond lengths are given in Table S1. See <http://www.rsc.org/suppdata/cc/> for crystallographic data in CIF format (CCDC reference number 2079048).

- Ref.** (1) DENZO-SMN. (1997). Z. Otwinowski, W. Minor, *Methods in Enzymology*, 276: *Macromolecular Crystallography, Part A*, 307 – 326, C. W. J. Carter, M. I. Simon, R. M. Sweet, Editors, Academic Press.
- (2) G. H. Sheldrick, SHELX 97, *A software package for the solution and refinement of X-ray data*; University of Göttingen: Göttingen, Germany, **1997**.
- (3) D. T. Cromer, J. T. Waber, *International Tables for X-Ray Crystallography*, Kynoch Press, Birmingham, vol. 4, **1974**, Table 2.2A.



**Table S1.** Selected Bond Lengths (Å) and angles (°) for **1**.

|                   |           |                     |          |
|-------------------|-----------|---------------------|----------|
| Tb(1)-O(15)       | 2.31(2)   | O(15)-Tb(1)-O(7)    | 125.0(7) |
| Tb(1)-O(5)        | 2.327(19) | O(5)-Tb(1)-O(7)     | 103.5(6) |
| Tb(1)-O(14)       | 2.35(2)   | O(14)-Tb(1)-O(7)    | 136.7(6) |
| Tb(1)-O(2)        | 2.396(18) | O(2)-Tb(1)-O(7)     | 64.1(6)  |
| Tb(1)-O(11)       | 2.477(19) | O(11)-Tb(1)-O(7)    | 86.5(6)  |
| Tb(1)-O(8)        | 2.524(15) | O(8)-Tb(1)-O(7)     | 57.8(5)  |
| Tb(1)-O(12)       | 2.763(19) | O(12)-Tb(1)-O(7)    | 65.7(6)  |
| Tb(1)-O(7)        | 2.80(2)   | O(15)-Tb(1)-O(6)    | 87.9(6)  |
| Tb(1)-O(6)        | 2.827(18) | O(5)-Tb(1)-O(6)     | 55.6(6)  |
| Tb(1)-O(1)        | 2.857(19) | O(14)-Tb(1)-O(6)    | 70.8(6)  |
| Cd(1)-O(13)       | 2.23(2)   | O(2)-Tb(1)-O(6)     | 130.3(5) |
| Cd(1)-O(11)       | 2.276(18) | O(11)-Tb(1)-O(6)    | 70.2(6)  |
| Cd(1)-N(4)        | 2.34(2)   | O(8)-Tb(1)-O(6)     | 121.5(5) |
| Cd(1)-O(2)        | 2.358(17) | O(12)-Tb(1)-O(6)    | 71.3(6)  |
| Cd(1)-N(1)        | 2.39(2)   | O(7)-Tb(1)-O(6)     | 137.0(5) |
| Cd(1)-O(10)#1     | 2.543(18) | O(15)-Tb(1)-O(1)    | 68.4(6)  |
| Cd(2)-N(3)        | 2.22(2)   | O(5)-Tb(1)-O(1)     | 127.3(6) |
| Cd(2)-N(2)        | 2.23(2)   | O(14)-Tb(1)-O(1)    | 87.3(6)  |
| Cd(2)-O(8)        | 2.256(15) | O(2)-Tb(1)-O(1)     | 54.9(6)  |
| Cd(2)-O(5)        | 2.32(2)   | O(11)-Tb(1)-O(1)    | 122.2(6) |
| Cd(2)-O(16)       | 2.35(3)   | O(8)-Tb(1)-O(1)     | 68.5(5)  |
| Cd(2)-O(9)        | 2.489(17) | O(12)-Tb(1)-O(1)    | 137.8(6) |
| O(15)-Tb(1)-O(5)  | 73.8(7)   | O(7)-Tb(1)-O(1)     | 72.1(6)  |
| O(15)-Tb(1)-O(14) | 77.7(7)   | O(6)-Tb(1)-O(1)     | 150.9(5) |
| O(5)-Tb(1)-O(14)  | 119.0(7)  | O(13)-Cd(1)-O(11)   | 111.3(8) |
| O(15)-Tb(1)-O(2)  | 116.0(7)  | O(13)-Cd(1)-N(4)    | 103.4(8) |
| O(5)-Tb(1)-O(2)   | 167.0(6)  | O(11)-Cd(1)-N(4)    | 81.7(7)  |
| O(14)-Tb(1)-O(2)  | 72.8(6)   | O(13)-Cd(1)-O(2)    | 87.9(7)  |
| O(15)-Tb(1)-O(11) | 147.4(7)  | O(11)-Cd(1)-O(2)    | 71.3(7)  |
| O(5)-Tb(1)-O(11)  | 109.6(7)  | N(4)-Cd(1)-O(2)     | 153.1(7) |
| O(14)-Tb(1)-O(11) | 72.6(6)   | O(13)-Cd(1)-N(1)    | 135.6(8) |
| O(2)-Tb(1)-O(11)  | 67.3(6)   | O(11)-Cd(1)-N(1)    | 102.2(7) |
| O(15)-Tb(1)-O(8)  | 72.8(6)   | N(4)-Cd(1)-N(1)     | 109.6(8) |
| O(5)-Tb(1)-O(8)   | 66.0(6)   | O(2)-Cd(1)-N(1)     | 75.9(7)  |
| O(14)-Tb(1)-O(8)  | 147.0(6)  | O(13)-Cd(1)-O(10)#1 | 81.1(7)  |
| O(2)-Tb(1)-O(8)   | 107.5(5)  | O(11)-Cd(1)-O(10)#1 | 150.2(7) |
| O(11)-Tb(1)-O(8)  | 139.2(6)  | N(4)-Cd(1)-O(10)#1  | 68.8(7)  |
| O(15)-Tb(1)-O(12) | 139.0(7)  | O(2)-Cd(1)-O(10)#1  | 137.8(6) |
| O(5)-Tb(1)-O(12)  | 65.2(6)   | N(1)-Cd(1)-O(10)#1  | 84.0(7)  |
| O(14)-Tb(1)-O(12) | 124.2(6)  | N(3)-Cd(2)-N(2)     | 112.1(8) |
| O(2)-Tb(1)-O(12)  | 104.2(6)  | N(3)-Cd(2)-O(8)     | 78.0(7)  |
| O(11)-Tb(1)-O(12) | 56.7(6)   | N(2)-Cd(2)-O(8)     | 102.7(6) |
| O(8)-Tb(1)-O(12)  | 88.3(6)   | N(3)-Cd(2)-O(5)     | 148.4(8) |

|                  |          |                  |          |
|------------------|----------|------------------|----------|
| N(2)-Cd(2)-O(5)  | 79.0(8)  | N(3)-Cd(2)-O(9)  | 70.3(7)  |
| O(8)-Cd(2)-O(5)  | 70.6(6)  | N(2)-Cd(2)-O(9)  | 86.6(7)  |
| N(3)-Cd(2)-O(16) | 101.0(9) | O(8)-Cd(2)-O(9)  | 148.2(6) |
| N(2)-Cd(2)-O(16) | 136.5(9) | O(5)-Cd(2)-O(9)  | 141.2(7) |
| O(8)-Cd(2)-O(16) | 111.3(9) | O(16)-Cd(2)-O(9) | 78.7(9)  |
| O(5)-Cd(2)-O(16) | 87.4(9)  |                  |          |

---
